# Supplementary material for: Increased Production of B-Cell Activating Cytokines and Altered Peripheral B-Cell Subset Distribution during HIV-Related Classical Hodgkin Lymphoma
Source: MDPI journal article supplement (doi:10.3390/cancers14010128), 2021-12-28
Supplement: s1 [file s1]

## Article

# Increased Production of B-Cell Activating Cytokines and Altered Peripheral B-Cell Subset Distribution during HIV-Related Classical Hodgkin Lymphoma

Raphael Lievin \* and Houria Hendel-Chavez \*, Aliou Balde, Remi Lancar, Michele Algarte Genin, Roman Krzysiek, Dominique Costagliola, Lambert Assoumou, Yassine Taoufik \*, Caroline Besson \*

## Supplementary Methods:

**Immunological analyses:** The following antibodies were used to assess B-cell subsets: anti CD45 (PerCP), anti-CD19 (PerCP), anti-IgD (FITC), anti-CD27 (APC), anti-BAFFR (PE), anti-CD38 (PE), anti-IgM (FITC), anti-CD21 (FITC, all from BD Biosciences). In addition, anti-CD3 (FITC), anti-CD4 (APC), anti-CD8 (FITC), anti-CD16 and anti-CD56 (PE) MoAb were used to analyze T and NK-cells populations (all from BD Biosciences).

To analyze the absolute values of T and NK populations, the following antibodies were used with 2 premixes (BD Biosciences):

- (1) Anti-CD45 (PerCP), anti-CD3 (FITC), anti-CD4 (APC) and anti-CD8 (PE)
- (2) anti-CD45 (PerCP), anti-CD3 (FITC), anti-CD19 (APC) and anti-CD16-56 (PE)

To calculate the % of B-cell subsets, 3 premixes were used:

- (1) anti-CD19 (PerCP), anti-IgD (FITC), anti-BAFF-R (PE), anti-CD27 (APC)
- (2) anti-CD19 (PerCP), anti-IgM (FITC), anti-CD38 (PE)
- (3) anti-CD19 (PerCP), anti-CD21 (FITC), anti-CD38 (PE)

**Table S1.** Comparison of serum marker levels collected at HIV- cHL diagnosis and one to three years before diagnosis of cHL.

|               |         | Before diagnosis<br>(N = 7) | At baseline<br>(N = 7) | P-values*   |
|---------------|---------|-----------------------------|------------------------|-------------|
| IL-10 (pg/mL) | Median  | 9.8                         | 25.5                   | <b>0.02</b> |
|               | IQR     | 5.9 – 21.8                  | 17.5 – 80.7            |             |
| IL-6 (pg/mL)  | Médiane | 5.4                         | 33.5                   | 0.22        |
|               | IQR     | 3.0 – 13.2                  | 4.7 – 63.3             |             |
| BAFF (pg/mL)  | Médiane | 553.0                       | 960.6                  | 0.30        |
|               | IQR     | 447.5 – 942.5               | 514.0 – 2075.0         |             |

\* P values were determined by Wilcoxon signed-rank test for paired samples.

**Table S2.** Comparisons of the immunological characteristics of patients 24 months after HIV-cHL diagnosis matched with their controls at baseline.

|                                                       |        | Populations                         |                                | P-values* |
|-------------------------------------------------------|--------|-------------------------------------|--------------------------------|-----------|
|                                                       |        | cHL patients at 24 months<br>(N=11) | Controls at baseline<br>(N=11) |           |
| Serum Markers                                         |        |                                     |                                |           |
| IgG levels (g/L)                                      | Median | 10.5                                | 14.1                           | 0.04      |
|                                                       | IQR    | 9.6-12.4                            | 10.3-16.5                      |           |
|                                                       | N      | 11                                  | 11                             |           |
| IgA levels (g/L)                                      | Median | 2.5                                 | 2.2                            | 0.95      |
|                                                       | IQR    | 1.3-3.2                             | 1.7-2.6                        |           |
|                                                       | N      | 11                                  | 11                             |           |
| IgM levels (g/L)                                      | Median | 0.6                                 | 0.8                            | 0.38      |
|                                                       | IQR    | 0.5-0.7                             | 0.4-1.3                        |           |
|                                                       | N      | 11                                  | 11                             |           |
| IL-10 (pg/mL)                                         | Median | 7.2                                 | 4.5                            | 0.02      |
|                                                       | IQR    | 4.6 – 13.0                          | 3.9 – 7.5                      |           |
|                                                       | N      | 11                                  | 11                             |           |
| IL-6 (pg/mL)                                          | Median | 3.5                                 | 2.3                            | 0.63      |
|                                                       | IQR    | 2.0 – 4.9                           | 0.8 – 9.0                      |           |
|                                                       | N      | 11                                  | 11                             |           |
| BAFF (pg/mL)                                          | Median | 605.5                               | 426.0                          | 0.07      |
|                                                       | IQR    | 354.7 – 730.8                       | 335.8 – 531.3                  |           |
|                                                       | N      | 11                                  | 11                             |           |
| Lymphocytic subpopulations                            |        |                                     |                                |           |
| CD45+ Lymphocytes<br>(absolute values, cells/μL)      | Median | 2526                                | 1752                           | 0.15      |
|                                                       | IQR    | 1085 – 2975                         | 1546 – 2178                    |           |
|                                                       | N      | 11                                  | 11                             |           |
| CD3+CD4+ T-cells<br>(absolute values, cells/μL)       | Median | 654                                 | 414                            | 0.10      |
|                                                       | IQR    | 330 – 735                           | 309 – 558                      |           |
|                                                       | N      | 11                                  | 11                             |           |
| CD3+ CD8+ T-cells<br>(absolute values, cells/μL)      | Median | 819                                 | 674                            | 0.32      |
|                                                       | IQR    | 496 – 1216                          | 598 – 814                      |           |
|                                                       | N      | 11                                  | 11                             |           |
| CD19+ B-cells<br>(absolute values, cells/μL)          | Median | 358                                 | 166                            | 0.01      |
|                                                       | IQR    | 280 – 564                           | 125 – 256                      |           |
|                                                       | N      | 11                                  | 11                             |           |
| %CD27-IgD+ CD19+ na-<br>ive B-cells                   | Median | 90.0                                | 51.7                           | 0.002     |
|                                                       | IQR    | 86.6-94.0                           | 33.7-66.6                      |           |
|                                                       | N      | 10                                  | 10                             |           |
| %CD27+IgD+ in CD19+<br>marginal zone-type B-<br>cells | Median | 90.0                                | 51.7                           | 0.002     |
|                                                       | IQR    | 86.6-94.0                           | 33.7-66.6                      |           |
|                                                       | N      | 10                                  | 10                             |           |

|                                                             |        |          |           |       |
|-------------------------------------------------------------|--------|----------|-----------|-------|
| %CD27+IgD- in CD19+<br>memory B-cells                       | Median | 2.7      | 11.7      | 0.002 |
|                                                             | IQR    | 2.4-4.8  | 5.4-15.2  |       |
|                                                             | N      | 10       | 10        |       |
| CD56+CD16+ NK-cells<br>(absolute values,<br>cells/ $\mu$ L) | Median | 4.2      | 26.8      | 0.97  |
|                                                             | IQR    | 3.0-5.2  | 18.2-36.0 |       |
|                                                             | N      | 10       | 10        |       |
|                                                             | Median | 295      | 302       |       |
|                                                             | IQR    | 57 – 565 | 125 – 424 |       |
|                                                             | N      | 11       | 11        |       |

---

\* P values were determined by the Wilcoxon signed-rank test (continuous variables). cHL: classical Hodgkin lymphoma; IQR: interquartile range; NK: natural killer

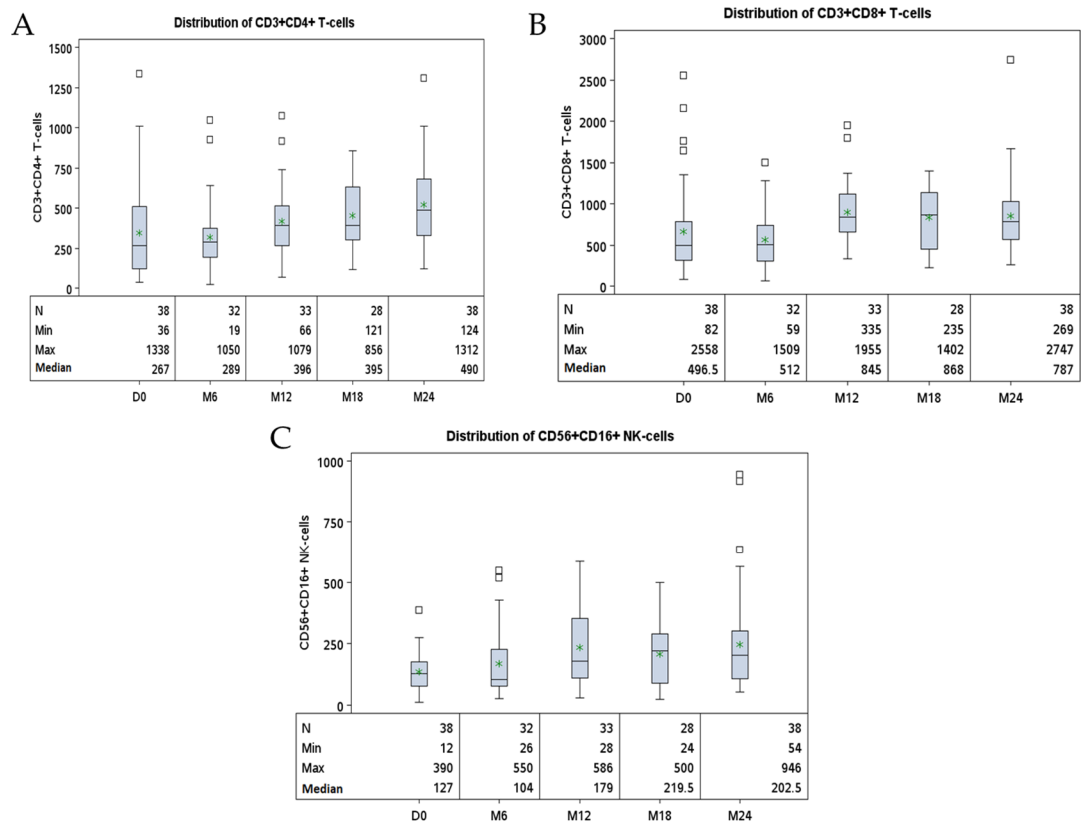

**Figure S1. Longitudinal evolution of TCD4, TCD8 and NK lymphocytic subpopulations in HIV-positive cHL patients.** Evolution of the counts of CD3+CD4+ T-cells (A), CD3+CD8+ T-cells (B), CD56+CD16+ NK-cells (C) every 6 months from diagnosis during 24 month.
